# Supplementary material
Source: PubMed Central journal article supplement (PMC4907808)
Supplement: NIHMS756140-supplement.pdf [file NIHMS756140-supplement.pdf]

## Supplementary data

**Table 1.** After excluding subjects with KL=3, comparison of change in global, articular and bone layer T2 relaxation times (mean [95% confidence interval]) over 48 months of the cartilage compartments of the knees between the group with stable weight and both weight loss groups<sup>1,2</sup>. An increase in T2 values indicates a worsening of cartilage degradation.

| Parameter                                      | Compartment                          |                        | stable weight group | 5-10% weight loss group | P-value<br>5-10%<br>weight loss<br>vs. stable<br>weight<br>group | >10% weight loss group | P-value<br>>10%<br>weight loss<br>vs. stable<br>weight<br>group |
|------------------------------------------------|--------------------------------------|------------------------|---------------------|-------------------------|------------------------------------------------------------------|------------------------|-----------------------------------------------------------------|
| <b>Global<br/>ΔT2 (in<br/>ms)</b>              | <b>all<br/>compartment<br/>ments</b> | Baseline mean T2 (ms)  | 32.5 [32.2, 32.7]   | 32.4 [32.1, 32.7]       |                                                                  | 32.7 [32.3, 33.2]      |                                                                 |
|                                                |                                      | Change in mean T2 (ms) | 1.0 [0.8, 1.3]      | 0.9 [0.6, 1.1]          | 0.7                                                              |                        | 0.4                                                             |
|                                                | <b>LF</b>                            | Baseline mean T2 (ms)  | 36.3 [35.9, 36.7]   | 35.7 [35.2, 36.7]       | 0.06                                                             | 36.3 [35.6, 37.0]      | 0.9                                                             |
|                                                |                                      | Change in mean T2 (ms) | 1.6 [1.2, 1.9]      | 1.4 [1.0, 1.8]          | 0.6                                                              | 1.4 [1.2, 1.7]         | 0.8                                                             |
|                                                | <b>LT</b>                            | Baseline mean T2 (ms)  | 27.1 [26.8, 27.3]   | 27.3 [26.9, 27.6]       | 0.4                                                              | 27.1 [26.4, 27.9]      | 0.8                                                             |
|                                                |                                      | Change in mean T2 (ms) | 1.3 [1.0, 1.6]      | 1.0 [0.6, 1.2]          | 0.08                                                             | 0.9 [0.6, 1.5]         | 0.6                                                             |
|                                                | <b>MF</b>                            | Baseline mean T2 (ms)  | 39.7 [39.2, 40.1]   | 39.1 [38.6, 39.6]       | 0.1                                                              | 40.2 [39.5, 40.5]      | 0.2                                                             |
|                                                |                                      | Change in mean T2 (ms) | 0.7 [0.3, 1.0]      | 0.7 [0.4, 1.2]          | 0.1                                                              | 0.4 [0.2, 1.1]         | 0.4                                                             |
|                                                | <b>MT</b>                            | Baseline mean T2 (ms)  | 29.1 [28.9, 29.4]   | 29.2 [28.8, 29.6]       | 0.8                                                              | 29.3 [28.7, 29.9]      | 0.6                                                             |
|                                                |                                      | Change in mean T2 (ms) | 1.1 [0.8, 1.4]      | 0.7 [0.4, 1.1]          | 0.2                                                              | 0.0 [-0.2, 0.4]        | <0.001                                                          |
|                                                | <b>PAT</b>                           | Baseline mean T2 (ms)  | 30.6 [30.1, 30.9]   | 30.6 [30.1, 31.0]       | 0.9                                                              | 31.3 [30.5, 32.2]      | 0.1                                                             |
|                                                |                                      | Change in mean T2 (ms) | 1.0 [0.6, 1.5]      | 0.5 [0.01, 0.9]         | 0.08                                                             | 0.4 [-0.2, 1.2]        | 0.2                                                             |
|                                                |                                      |                        |                     |                         |                                                                  |                        |                                                                 |
| <b>Articular<br/>Layer<br/>ΔT2 (in<br/>ms)</b> | <b>all<br/>compartment<br/>ments</b> | Baseline mean T2 (ms)  | 35.3 [35.0, 35.7]   | 35.2 [34.9, 35.6]       | 0.7                                                              | 35.6 [35.0, 36.2]      | 0.4                                                             |
|                                                |                                      | Change in mean T2 (ms) | 1.2 [0.9, 1.5]      | 1.0 [0.7, 1.3]          | 0.4                                                              | 0.7 [0.1, 1.2]         | 0.1                                                             |
|                                                | <b>MT</b>                            | Baseline mean T2 (ms)  | 32.1 [31.7, 32.5]   | 32.2 [31.7, 32.7]       | 0.8                                                              | 32.3 [31.5, 33.2]      | 0.6                                                             |
|                                                |                                      | Change in mean T2 (ms) | 1.1 [0.8, 1.4]      | 0.8 [0.9, 1.4]          | 0.2                                                              | 0.0 [-0.4, 0.3]        | <0.001                                                          |
|                                                | <b>PAT</b>                           | Baseline mean T2 (ms)  | 33.2 [32.7, 33.7]   | 33.3 [32.7, 33.9]       | 0.2                                                              | 34.0 [33.0, 35.0]      | 0.2                                                             |
|                                                |                                      | Change in mean T2 (ms) | 1.0 [0.5, 1.5]      | 0.5 [0.0, 1.0]          | 0.2                                                              | 0.6 [0.0, 1.2]         | 0.1                                                             |
|                                                |                                      |                        |                     |                         |                                                                  |                        |                                                                 |
| <b>Bone<br/>Layer<br/>ΔT2 (in<br/>ms)</b>      | <b>all<br/>compartment<br/>ments</b> | Baseline mean T2 (ms)  | 29.6 [29.3, 29.8]   | 29.6 [29.3, 29.8]       | 0.9                                                              | 29.8 [29.3, 30.2]      | 0.4                                                             |
|                                                |                                      | Change in mean T2 (ms) | 1.0 [0.8, 1.2]      | 0.9 [0.6, 1.1]          | 0.5                                                              | 0.3 [-0.2, 0.7]        | 0.006                                                           |
|                                                | <b>MT</b>                            | Baseline mean T2 (ms)  | 26.4 [26.1, 26.7]   | 26.5 [26.1, 26.7]       | 0.8                                                              | 26.5 [25.9, 27.0]      | 0.9                                                             |
|                                                |                                      | Change in mean T2 (ms) | 1.0 [0.6, 1.2]      | 0.8 [0.4, 1.0]          | 0.8                                                              | -0.2 [-0.7, 0.4]       | <0.001                                                          |
|                                                | <b>PAT</b>                           | Baseline mean T2 (ms)  | 27.8 [27.5, 28.2]   | 27.8 [27.4, 28.2]       | 0.9                                                              | 28.6 [27.8, 29.4]      | 0.1                                                             |
|                                                |                                      | Change in mean T2 (ms) | 1.1 [0.7, 1.5]      | 0.5 [0.01, 0.9]         | 0.05                                                             | 0.1 [-0.3, 1.6]        | 0.004                                                           |

<sup>1</sup>The associations between changes of T2 relaxation times and weight loss (5-10% weight loss and >10% weight loss) over 48 months were assessed using linear regression models adjusting for age, sex, baseline BMI and baseline KL score.

<sup>2</sup>Results for KL=0, 1 and 2

BMI, body mass index; LF, lateral femur; LT, lateral tibia; MF, medial femur; MT, medial tibia; PAT, patella.
